# Supplementary material for: Transcriptomic profiling of Melon necrotic spot virus-infected melon plants revealed virus strain and plant cultivar-specific alterations
Source: BMC Genomics. 2016 Jun 7;17:429. doi: 10.1186/s12864-016-2772-5 (PMC4897865; doi:10.1186/s12864-016-2772-5)
Supplement: Additional file 3: Table S3 — Significant Gene Ontology (GO) categories among the cultivar-specific genes deregulated by MNSV-Mα5/3’264. Gene Ontology terms (GO terms) that were statistically over or under-represented among the 1618 genes that were specifically deregulated by MNSV-Mα5/3’264 in Planters Jumbo and among the 2925 genes that were specifically deregulated by the same virus in Tendral. (XLSX 12 kb) [file 12864_2016_2772_MOESM3_ESM.xlsx]

## Sheet: GO terms
Table S3. Significant Gene Ontology (GO) categories among the cultivar specific genes deregulated by MNSV-Ma5/3´264
Cultivar		GO-ID	Term	P-Value	#Test	#Ref	Over/Under
	Biological process
		GO:0009765	photosynthesis, light harvesting	12.2213	11	6	over
		GO:0006412	translation	13.0258	59	512	under
		GO:0046395	carboxylic acid catabolic process	63.1283	19	27	over
		GO:0006952	defense response	117.991	37	84	over
		GO:0042440	pigment metabolic process	244.888	20	33	over
		GO:0009607	response to biotic stimulus	461.514	37	91	over
	Molecular function
Tendral		GO:0003735	structural constituent of ribosome	75.733	38	356	under
	Cellular component
		GO:0009535	chloroplast thylakoid membrane	3.34782e-10	71	92	under
		GO:0022625	cytosolic large ribosomal subunit	3.02012	4	122	under
		GO:0031966	mitochondrial membrane	9.03705	8	153	under
		GO:0009523	photosystem II	35.0261	16	18	over
		GO:0048046	apoplast	138.361	38	87	over
		GO:0009522	photosystem I	163.945	12	12	over
		GO:0045271	respiratory chain complex I	431.403	0	45	under
		GO:0022627	cytosolic small ribosomal subunit	556.676	2	68	under
		GO:0009570	chloroplast stroma	606.146	49	135	over
	Biological process
		GO:0006813	potassium ion transport	6.16287	8	6	over
Planters Jumbo	Molecular function
		GO:0005267	potassium channel activity	28.1471	5	1	over
